# Supplementary material for: Impacts of negatively charged colloidal clay particles on photoisomerization of both anionic and cationic azobenzene molecules
Source: Royal Society of Chemistry journal article supplement (doi:10.1039/d2ra01020h), 2022-01-01
Supplement: d2ra01020h1.pdf [file d2ra01020h1.pdf]

**Electronic Supplementary Information**

**Impacts of negatively charged colloidal clay particles on photoisomerization of both of the anionic and cationic azobenzene molecules**

Emiko Mouri,<sup>a,b</sup> Kei Kajiwara,<sup>a</sup> Shuhei Kawasaki,<sup>a</sup> Yusuke Shimizu,<sup>a</sup> Hikaru Bando,<sup>a</sup> Hideki Sakai,<sup>c</sup> Teruyuki Nakato,<sup>a,b\*</sup>

<sup>a</sup> Department of Applied Chemistry, Kyushu Institute of Technology, 1-1 Sensui-cho, Tobata, Kitakyushu, Fukuoka 804-8550, Japan

<sup>b</sup> Strategic Research Unit for Innovative Multiscale Materials, Kyushu Institute of Technology, 1-1 Sensui-cho, Tobata, Kitakyushu, Fukuoka 804-8550, Japan

<sup>c</sup> Department of Pure and Applied Chemistry, Faculty of Science and Technology, Tokyo University of Science, 2641 Yamazaki, Noda, Chiba 278-8510, Japan

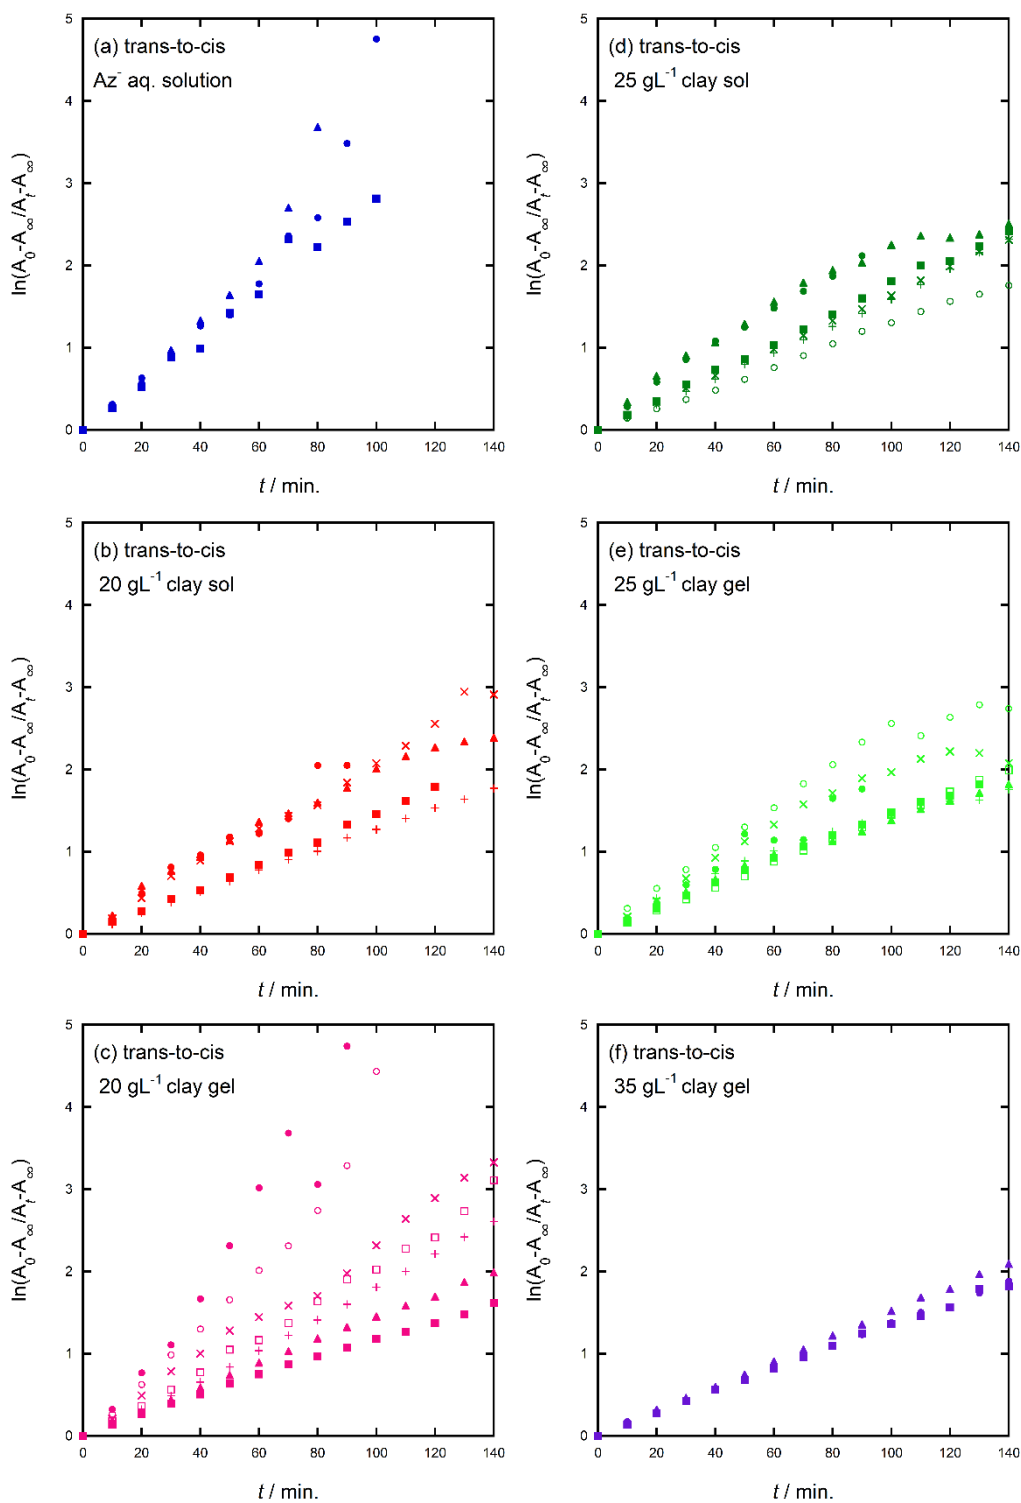

Figure S1. First-order plots against UV light irradiation time for  $Az^-$  systems from trans to cis form. (a)  $Az^-$  aqueous solution, (b)  $20 \text{ g L}^{-1}$  clay sol with  $Az^-$ , (c)  $20 \text{ g L}^{-1}$  clay gel with  $Az^-$ , (d)  $25 \text{ g L}^{-1}$  clay sol with  $Az^-$ , (e)  $25 \text{ g L}^{-1}$  clay gel with  $Az^-$ , (f)  $35 \text{ g L}^{-1}$  clay gel with  $Az^-$ .

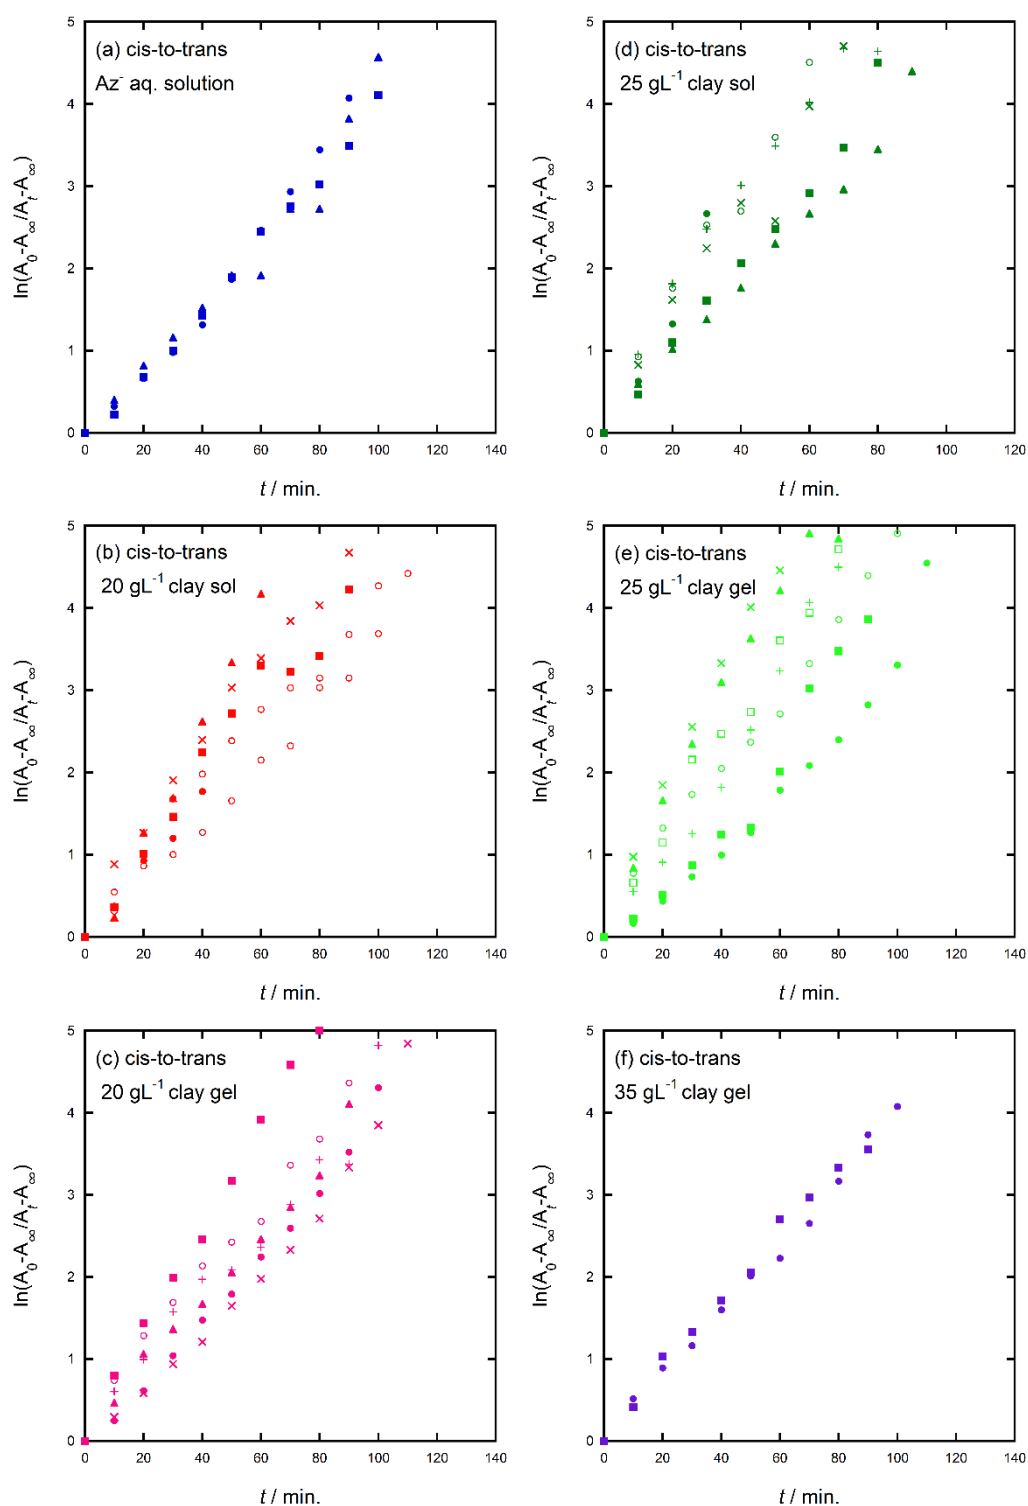

Figure S2. First-order plots against visible light irradiation time for Az<sup>-</sup> systems from cis to trans form. (a) Az<sup>-</sup> aqueous solution, (b) 20 g L<sup>-1</sup> clay sol with Az<sup>-</sup>, (c) 20 g L<sup>-1</sup> clay gel with Az<sup>-</sup>, (d) 25 g L<sup>-1</sup> clay sol with Az<sup>-</sup>, (e) 25 g L<sup>-1</sup> clay gel with Az<sup>-</sup>, (f) 35 g L<sup>-1</sup> clay gel with Az<sup>-</sup>.

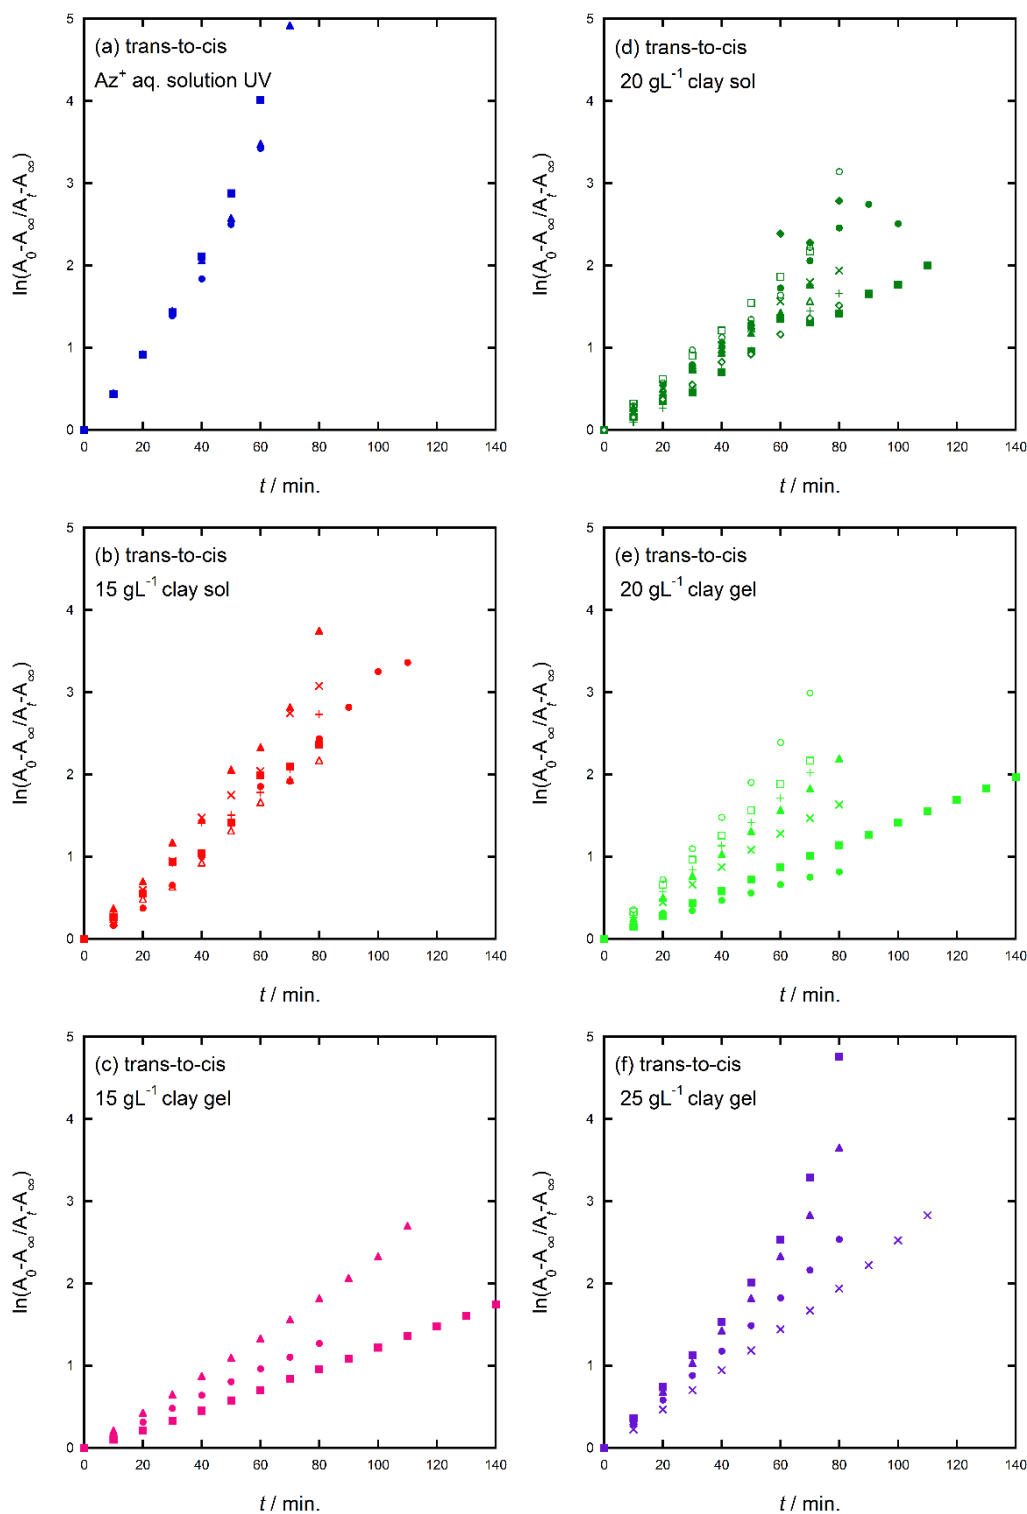

Figure S3. First-order plots against UV light irradiation time for  $Az^+$  systems from trans to cis form. (a)  $Az^+$  aqueous solution, (b)  $15 \text{ g L}^{-1}$  clay sol with  $Az^+$ , (c)  $15 \text{ g L}^{-1}$  clay gel with  $Az^+$ , (d)  $20 \text{ g L}^{-1}$  clay sol with  $Az^+$ , (e)  $20 \text{ g L}^{-1}$  clay gel with  $Az^+$ , (f)  $25 \text{ g L}^{-1}$  clay gel with  $Az^+$ .

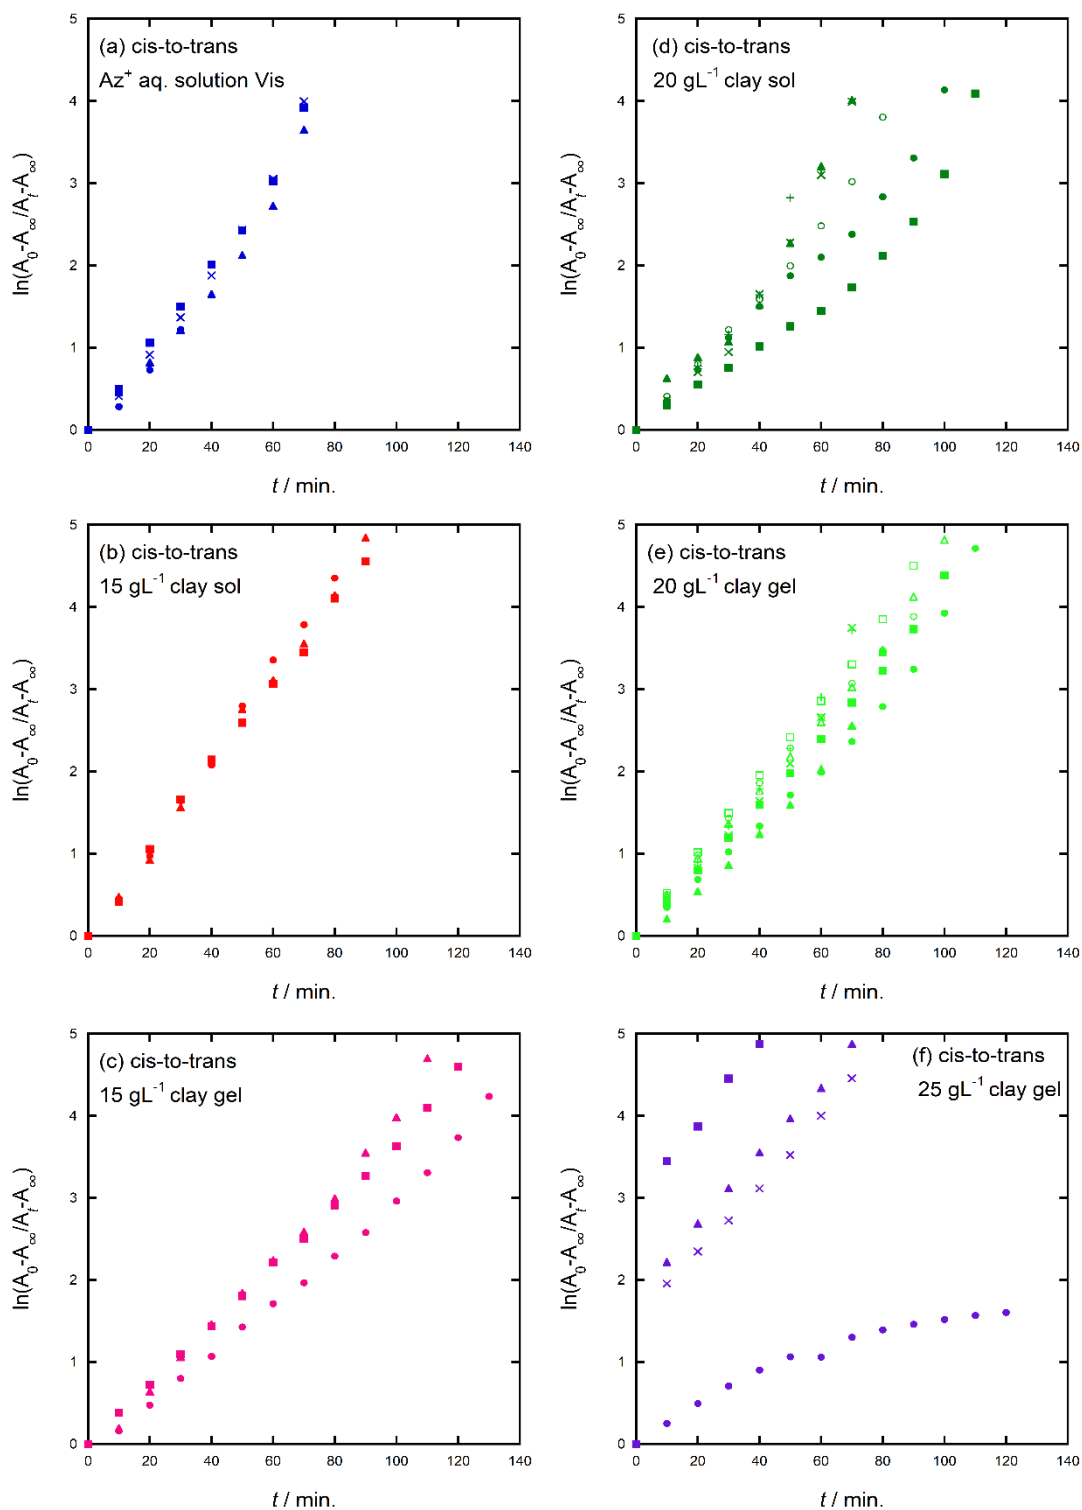

Figure S4. First-order plots against visible light irradiation time for Az<sup>+</sup> systems from cis to trans form. (a) Az<sup>+</sup> aqueous solution, (b) 15 g L<sup>-1</sup> clay sol with Az<sup>+</sup>, (c) 15 g L<sup>-1</sup> clay gel with Az<sup>+</sup>, (d) 20 g L<sup>-1</sup> clay sol with Az<sup>+</sup>, (e) 20 g L<sup>-1</sup> clay gel with Az<sup>+</sup>, (f) 25 g L<sup>-1</sup> clay gel with Az<sup>+</sup>.

Table S1. First-order rate constants for trans-to-cis and cis-to-trans photoisomerization of azobenzene dissolved in the clay colloids.

| Azobenzene species    | Clay concentration / g L <sup>-1</sup> | Sample status    | Trans-to-cis rate constant / min <sup>-1</sup> | Cis-to-trans rate constant / min <sup>-1</sup> |
|-----------------------|----------------------------------------|------------------|------------------------------------------------|------------------------------------------------|
| <b>Az<sup>-</sup></b> | 0                                      | Aqueous solution | 0.0289 ± 0.0029                                | 0.0351 ± 0.0040                                |
|                       | 20                                     | Clay sol         | 0.0198 ± 0.0058                                | 0.0512 ± 0.0089                                |
|                       | 20                                     | Clay gel         | 0.0219 ± 0.0083                                | 0.0503 ± 0.0167                                |
|                       | 25                                     | Clay sol         | 0.0209 ± 0.0074                                | 0.0722 ± 0.0160                                |
|                       | 25                                     | Clay gel         | 0.0192 ± 0.0043                                | 0.0567 ± 0.0255                                |
|                       | 35                                     | Clay gel         | 0.0149 ± 0.0009                                | 0.0477 ± 0.0017                                |
| <b>Az<sup>+</sup></b> | 0                                      | Aqueous solution | 0.0454 ± 0.0003                                | 0.0435 ± 0.0063                                |
|                       | 15                                     | Clay sol         | 0.0269 ± 0.0052                                | 0.0483 ± 0.0017                                |
|                       | 15                                     | Clay gel         | 0.0158 ± 0.0044                                | 0.0294 ± 0.0058                                |
|                       | 20                                     | Clay sol         | 0.0230 ± 0.0055                                | 0.0374 ± 0.0061                                |
|                       | 20                                     | Clay gel         | 0.0250 ± 0.0072                                | 0.0418 ± 0.0079                                |
|                       | 25                                     | Clay gel         | 0.0307 ± 0.0052                                | 0.1333 ± 0.0712                                |
